# Supplementary material for: Metal(ii) complexes based on 4-(2,6-di(pyridin-4-yl)pyridin-4-yl)benzonitrile: structures and electrocatalysis in hydrogen evolution reaction from water
Source: Royal Society of Chemistry journal article supplement (doi:10.1039/c4ce01259c), 2014-01-01
Supplement: c4ce01259c1.pdf [file c4ce01259c1.pdf]

## **Metal(II) complexes based on 4-(2,6-di(pyridin-4-yl)pyridin-4-yl)benzotrile: structures and electrocatalytic properties for hydrogen evolution reaction from water**

**Xiao Lin Gao,<sup>a</sup> Yun Gong,<sup>\*,a</sup> Pan Zhang,<sup>a</sup> Yong Xi Yang,<sup>a</sup> Jiang Ping Meng,<sup>a</sup> Miao Miao Zhang,<sup>a</sup> Jun Li Yin<sup>a</sup> and JianHua Lin<sup>\*, a, b</sup>**

<sup>a</sup> *Department of Applied Chemistry, College of Chemistry and Chemical Engineering, Chongqing University, Chongqing 400030, P. R. China Tel: +86-023-65106150 E-mail: gongyun7211@cqu.edu.cn*

<sup>b</sup> *Zhejiang University, Hangzhou 310058, P. R. China Tel: +86-0571-88981583 E-mail: jhlin@zju.edu.cn; jhlin@cqu.edu.cn; jhlin@pku.edu.cn*

### **Determination of Faradaic Efficiency**

Controlled potential electrolyses were conducted in a 50 mL 0.5 M Na<sub>2</sub>SO<sub>4</sub> solution at an applied potential of  $\square$ -1.1 V vs SCE ( $\eta = -0.46V$ ) for 0.5 hour. The pH change of the solution during the electrolysis was recorded with a pH meter. Assuming 100% Faradaic efficiency, the theoretical pH change over time can be calculated by the equation of  $pH = 14 + \lg \{ \Sigma(It)/(FV) \}$ , where I = current (A), t = time (s), F = Faraday constant (96485 C/mol), V = solution volume (0.05 L).<sup>1</sup> The amount of H<sub>2</sub> evolved was determined using gas chromatography (GC, 7890A, thermal conductivity detector (TCD), Ar carrier, Agilent). The theoretical (assuming 100% Faradic efficiency) hydrogen volume is based on the amount of consumed charge during the course of electrolysis.

**Table S1** Selected bond lengths (Å) and angles (°) for complexes **1-3**

---

| <i>Complex 1</i>  |            |                    |            |
|-------------------|------------|--------------------|------------|
| Ni(1)-O(5)        | 1.983(8)   | Ni(1)-O(5')        | 2.191(12)  |
| Ni(1)-O(7)        | 2.055(3)   | Ni(1)-O(6)         | 2.074(3)   |
| Ni(1)-N(2)        | 2.123(3)   | Ni(1)-N(3)#1       | 2.124(3)   |
| O(5)-Ni(1)-O(1')  | 67.5(6)    | O(6)-Ni(1)-O(5')   | 171.3(6)   |
| O(1')-Ni(1)-O(1)  | 25.52(18)  | O(5)-Ni(1)-O(1)    | 92.6(6)    |
| O(7)-Ni(1)-N(3)#1 | 86.38(12)  | O(1')-Ni(1)-N(3)#1 | 96.8(2)    |
| O(6)-Ni(1)-N(2)   | 90.25(14)  | N(2)-Ni(1)-N(3)#1  | 175.24(12) |
| <i>Complex 2</i>  |            |                    |            |
| Co(1)-O(10)       | 2.073(4)   | Co(1)-O(9)         | 2.143(4)   |
| Co(2)-O(13)       | 2.080(4)   | Co(2)-O(12)        | 2.123(4)   |
| Co(1)-N(2)        | 2.169(4)   | Co(1)-N(3)         | 2.172(5)   |
| Co(2)-N(6)        | 2.175(4)   | Co(2)-N(7)         | 2.179(4)   |
| O(1)-Co(1)-O(9)   | 85.07(17)  | O(11)-Co(1)-O(1)   | 178.84(16) |
| O(14)-Co(2)-O(12) | 177.07(16) | O(13)-Co(2)-O(14)  | 85.60(18)  |
| O(11)-Co(1)-N(3)  | 85.62(17)  | O(1)-Co(1)-N(3)    | 94.79(17)  |
| O(13)-Co(2)-N(6)  | 85.77(17)  | O(5)-Co(2)-N(6)    | 95.42(18)  |
| N(2)-Co(1)-N(3)   | 173.0(2)   | N(6)-Co(2)-N(7)    | 173.6(2)   |
| <i>Complex 3</i>  |            |                    |            |
| Cd(1)-O(10)       | 2.287(6)   | Cd(1)-O(11)        | 2.349(6)   |
| Cd(2)-O(14)       | 2.292(7)   | Cd(2)-O(12)        | 2.360(7)   |

---

---

|                   |          |                   |          |
|-------------------|----------|-------------------|----------|
| Cd(1)-N(2)        | 2.330(6) | Cd(1)-N(3)#2      | 2.335(7) |
| Cd(2)-N(7)#2      | 2.342(7) | Cd(2)-N(6)        | 2.343(7) |
| O(10)-Cd(1)-O(11) | 83.8(2)  | O(9)-Cd(1)-O(11)  | 174.9(2) |
| O(14)-Cd(2)-O(13) | 83.9(3)  | O(5)-Cd(2)-O(13)  | 178.6(2) |
| O(10)-Cd(1)-N(2)  | 84.6(2)  | O(1)-Cd(1)-N(2)   | 96.8(3)  |
| O(13)-Cd(2)-N(6)  | 82.1(2)  | O(5)-Cd(2)-N(6)   | 98.9(2)  |
| N(2)-Cd(1)-N(3)#1 | 171.1(2) | N(7)#1-Cd(2)-N(6) | 166.9(3) |

---

Symmetry transformations used to generate equivalent atoms:

#1  $x-1/2, -y+5/2, z-1/2$  #2  $x+1/2, -y+3/2, z+1/2$

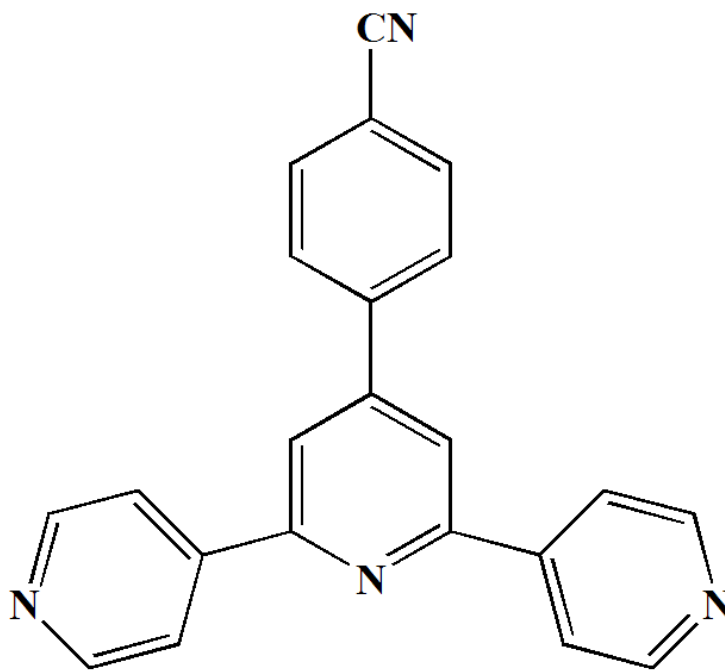

**Scheme S1** Schematic representation of **L**

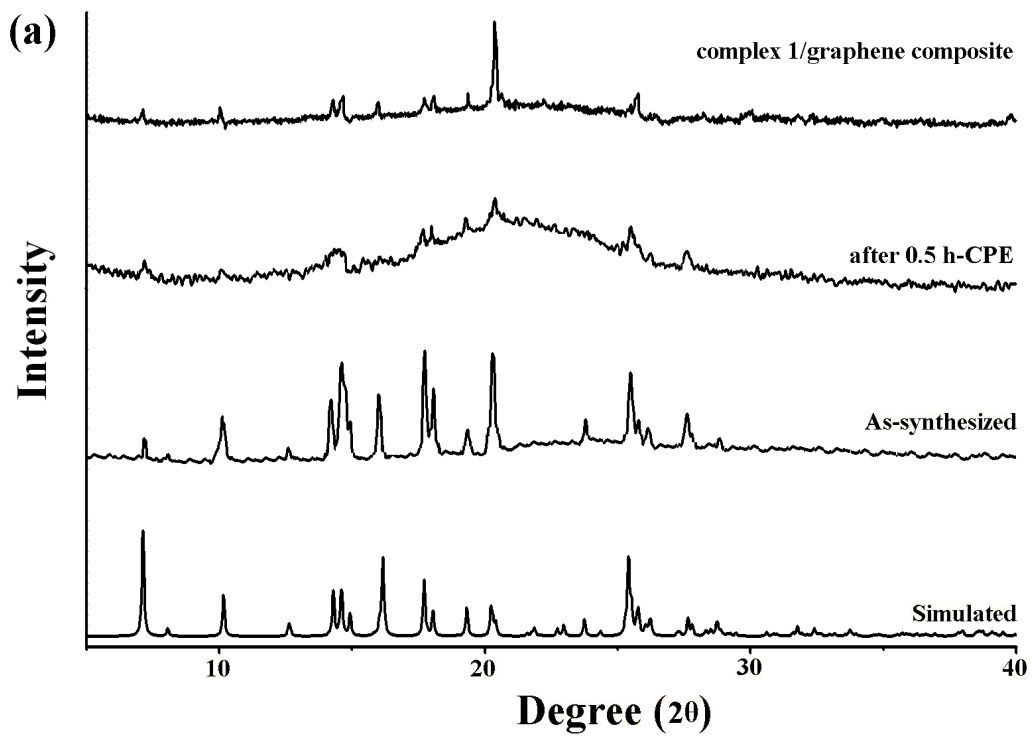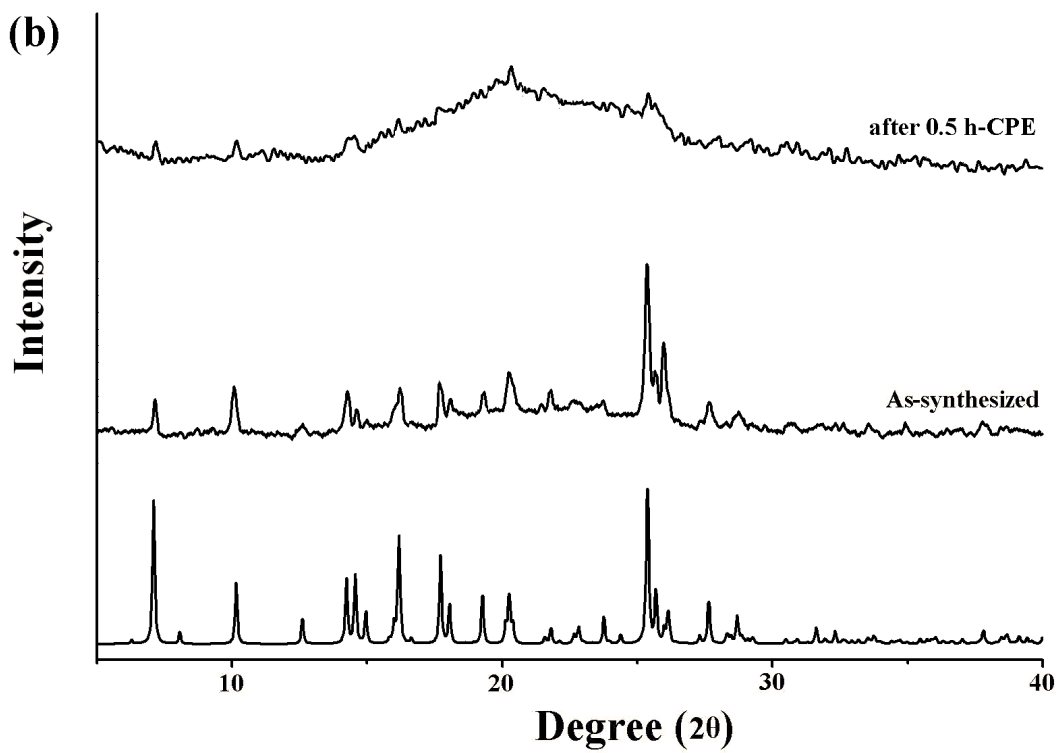

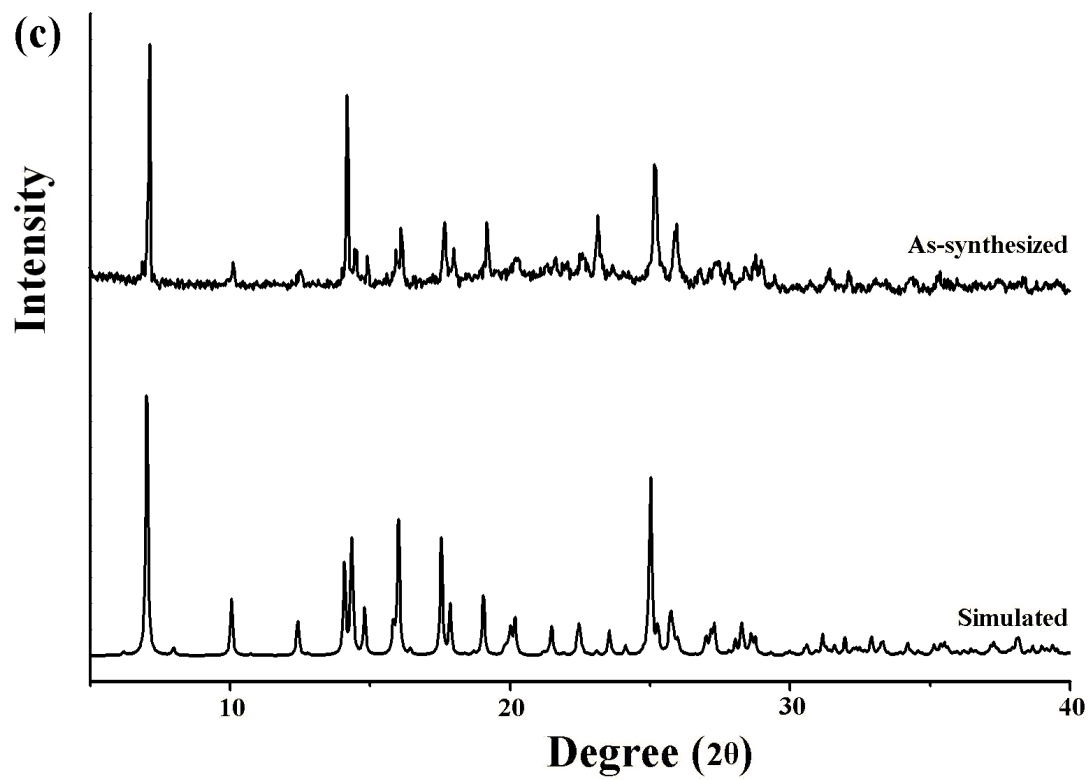

**Fig.S1** The powder XRD patterns for complexes **1 (a)**, **2 (b)** and **3 (c)**.

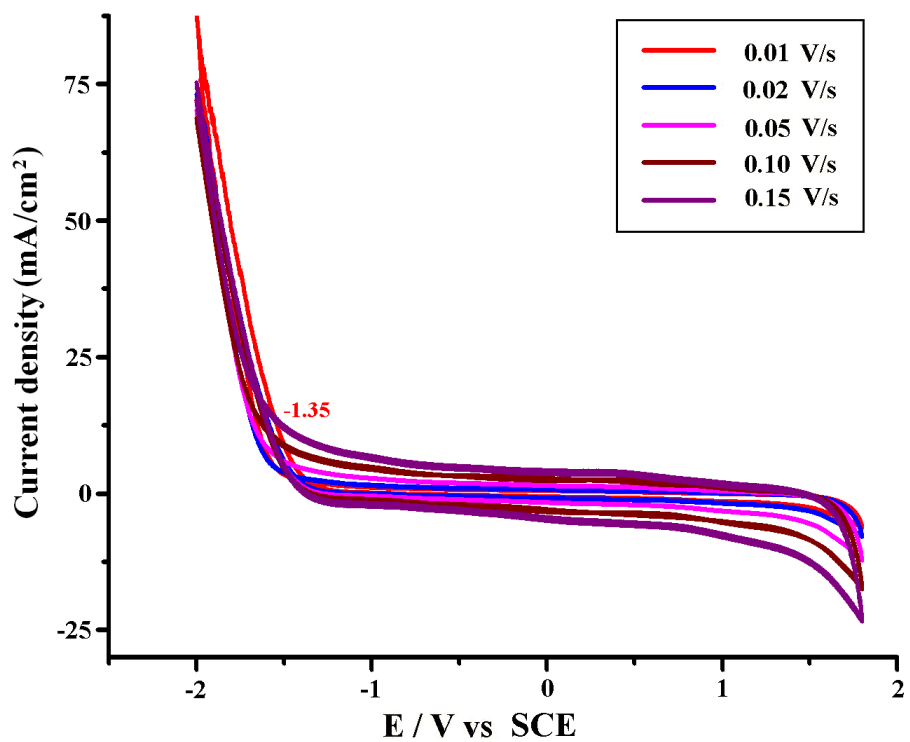

**Fig. S2** CVs of the bare GCE in the 0.5M Na<sub>2</sub>SO<sub>4</sub> aqueous solution (50 mL) at different sweep rates.

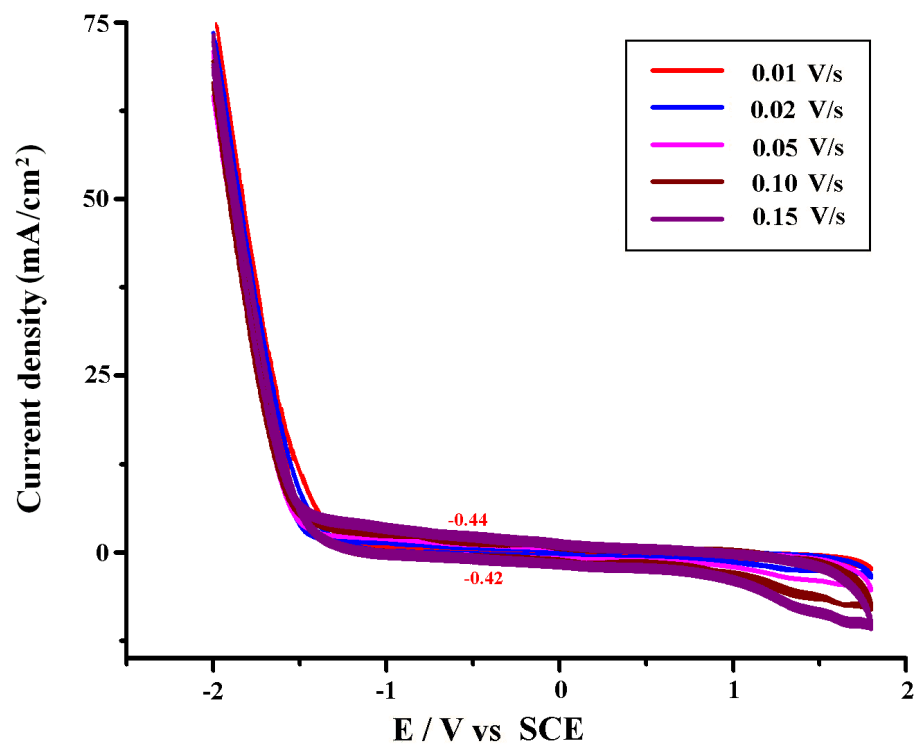

**Fig. S3** CVs of the L-GCE in the 0.5M Na<sub>2</sub>SO<sub>4</sub> aqueous solution (50 mL) at different sweep rates.

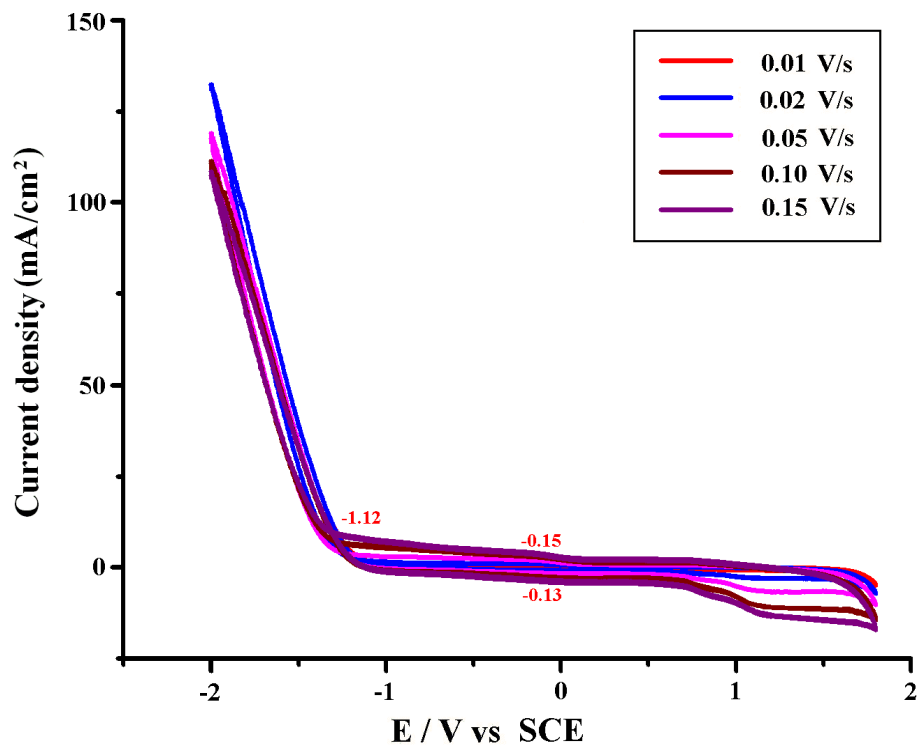

**Fig. S4** CVs of the 1-GCE in the 0.5M Na<sub>2</sub>SO<sub>4</sub> aqueous solution (50 mL) at different sweep rates.



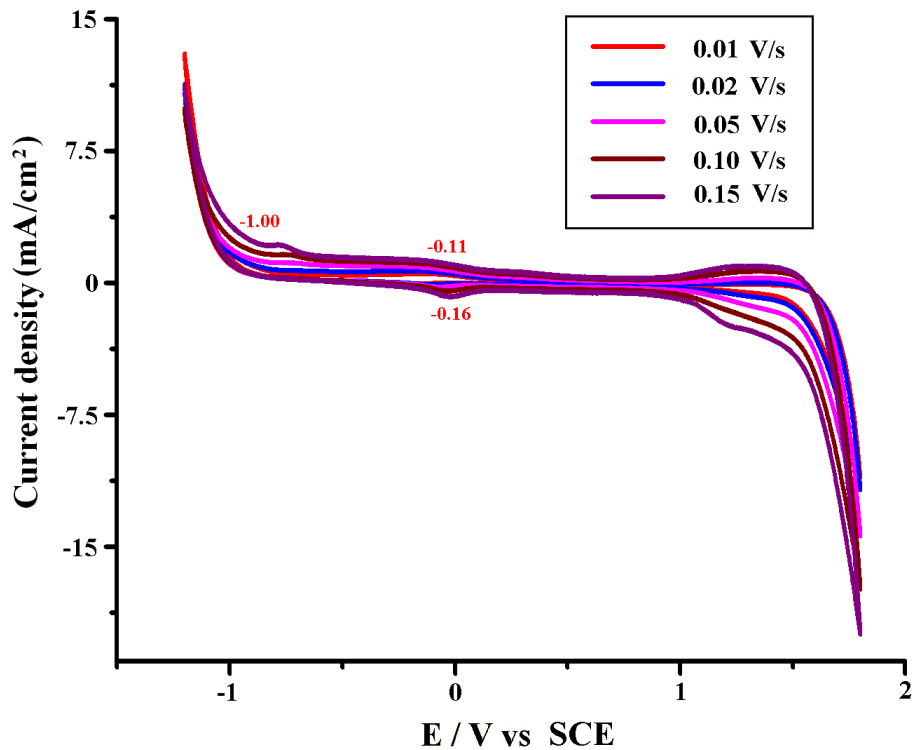

**Fig. S5** CVs of the 2-GCE in the 0.5M Na<sub>2</sub>SO<sub>4</sub> aqueous solution (50 mL) at different sweep rates.

(a)

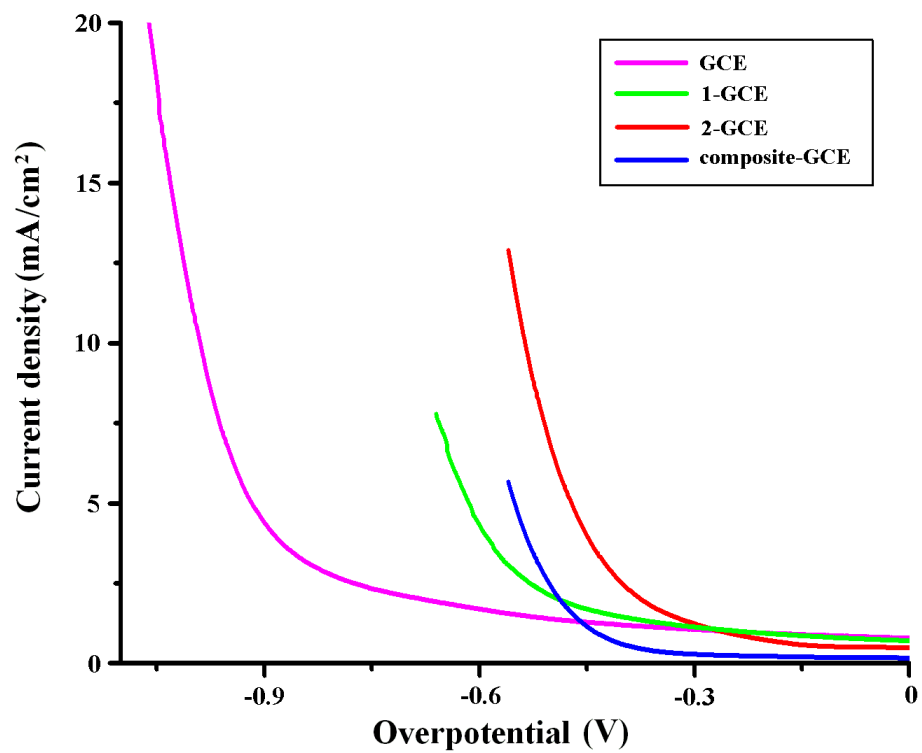

(b)

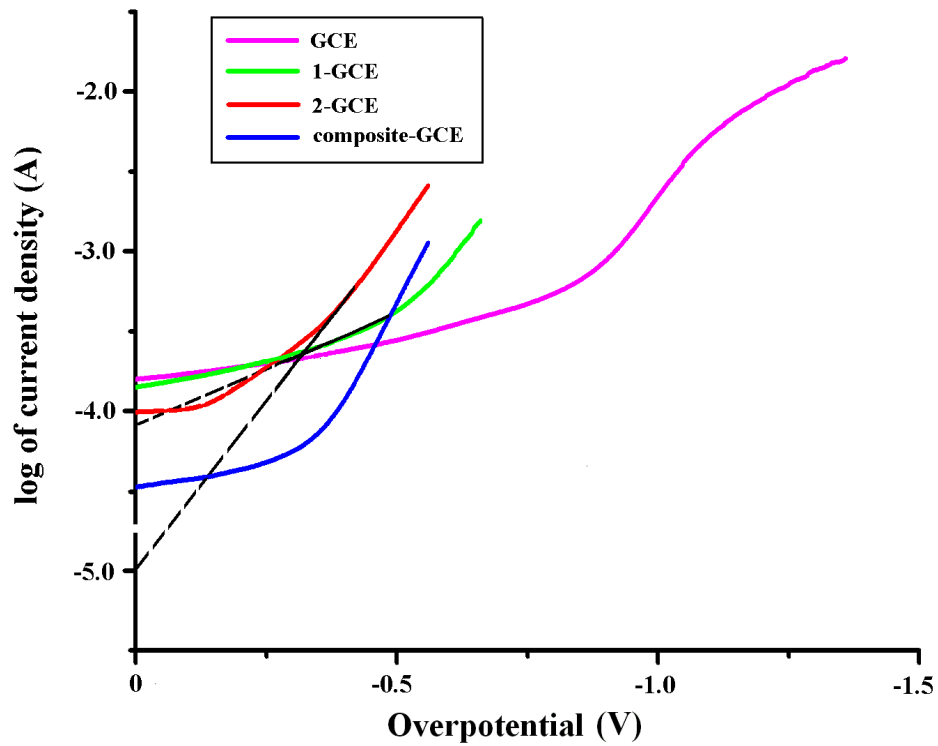

Fig. S6 Current intensity ( $i$ ) / overpotential ( $\eta$ ) diagrams (a) for the HER at the bare GCE,

**1-GCE, 2-GCE or composite-GCE** in 0.5 M Na<sub>2</sub>SO<sub>4</sub> solution (50mL) at sweep rates of 10 mV·s<sup>-1</sup>; Tafel plots of  $\log i$  against overpotential  $\eta$  for the HER (The linear part of the Tafel curves denoted in black dotted lines with the intercept at the y axis) (b).

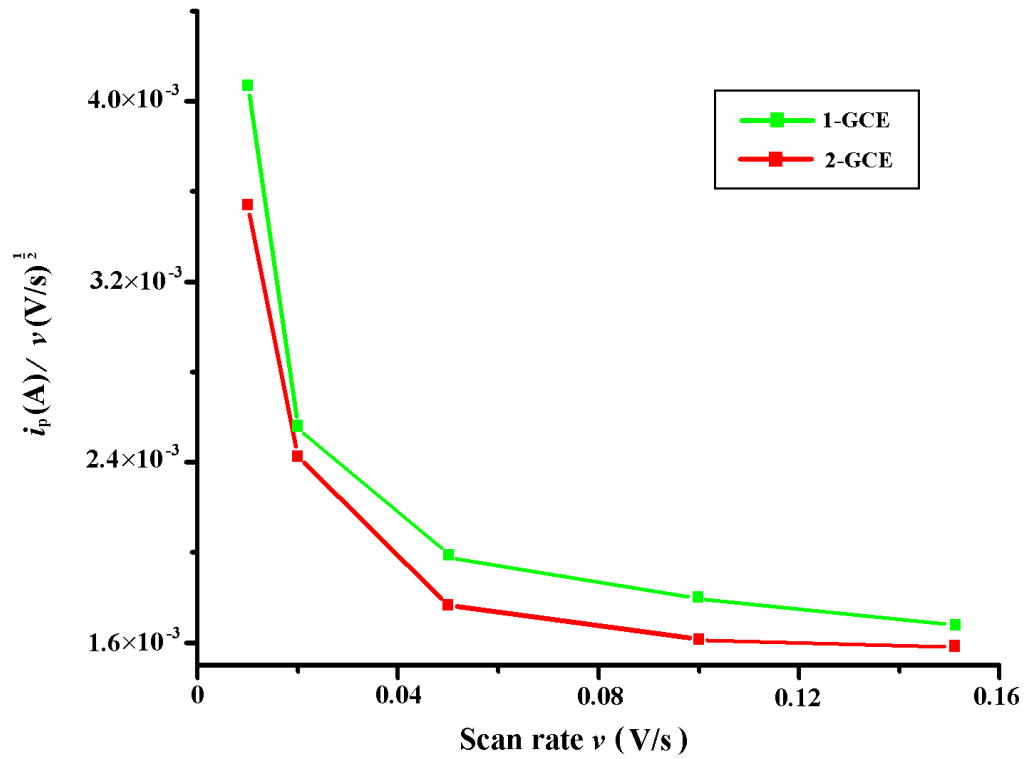

**Fig.S7** The plots of  $i_p / v^{1/2}$  against scan rate  $v$ .

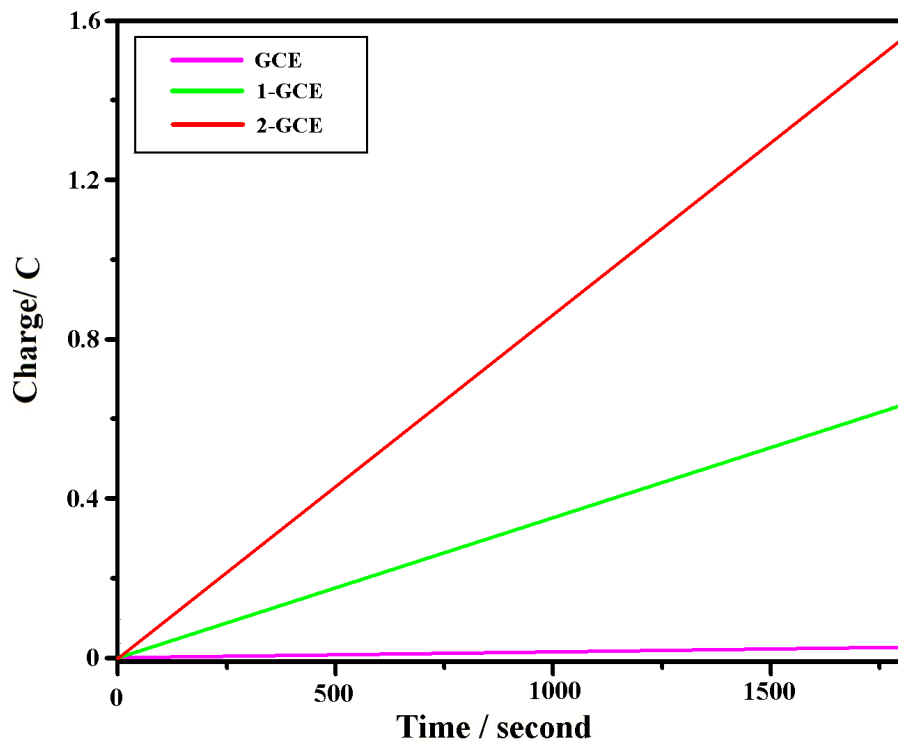

**Fig. S8** Controlled potential electrolysis of **1-GCE** (current density = 1.74 mA/cm<sup>2</sup>) (green), **2-GCE** (current density = 4.33 mA/cm<sup>2</sup>) (red) and the bare **GCE** (current density = 1.34 mA/cm<sup>2</sup>) (pink) in the 0.5 M Na<sub>2</sub>SO<sub>4</sub> aqueous solution (50mL), showing charge buildup versus time with an applied potential of -1.1V vs SCE ( $\eta = -0.44$ V).

(a)

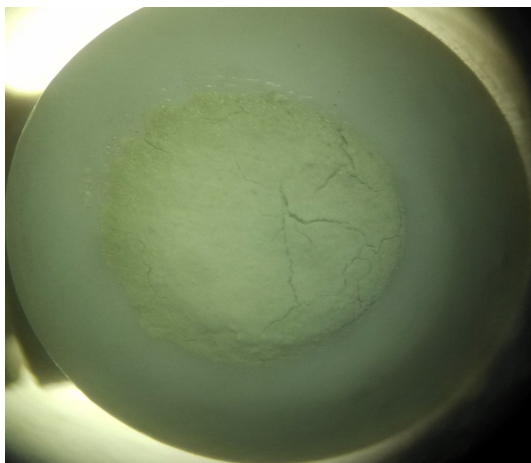

before 0.5 h- electrolysis at -1.1V vs SCE

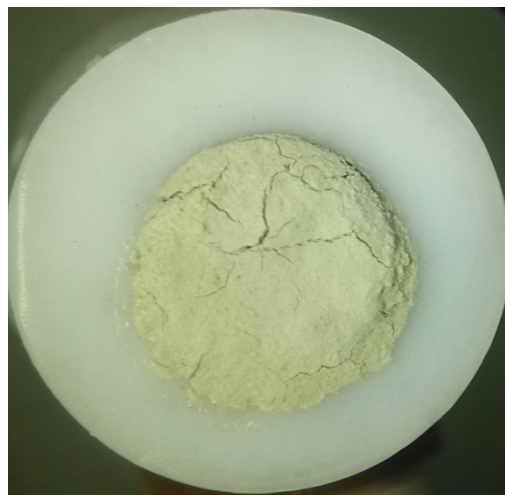

after 0.5 h- electrolysis at -1.1V vs SCE

(b)

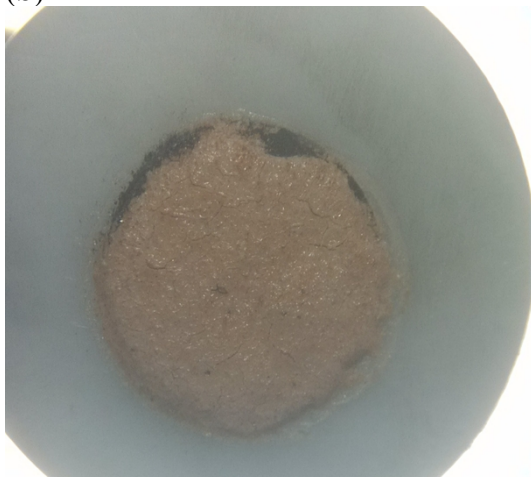

before 0.5 h- electrolysis at -1.1V vs SCE

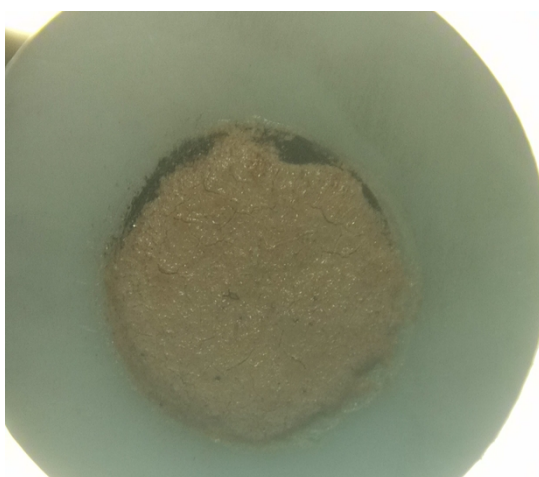

after 0.5 h- electrolysis at -1.1V vs SCE

**Fig. S9** The images of **1-GCE (a)** and **2-GCE (b)** before and after electrolysis at -1.1V vs SCE.

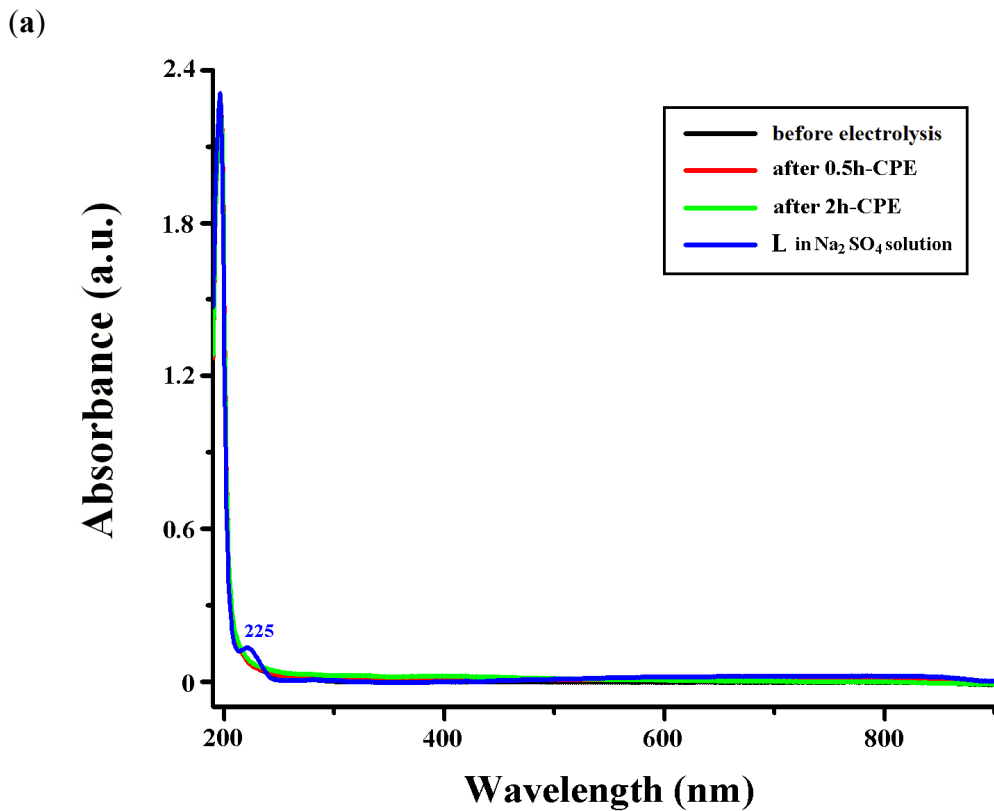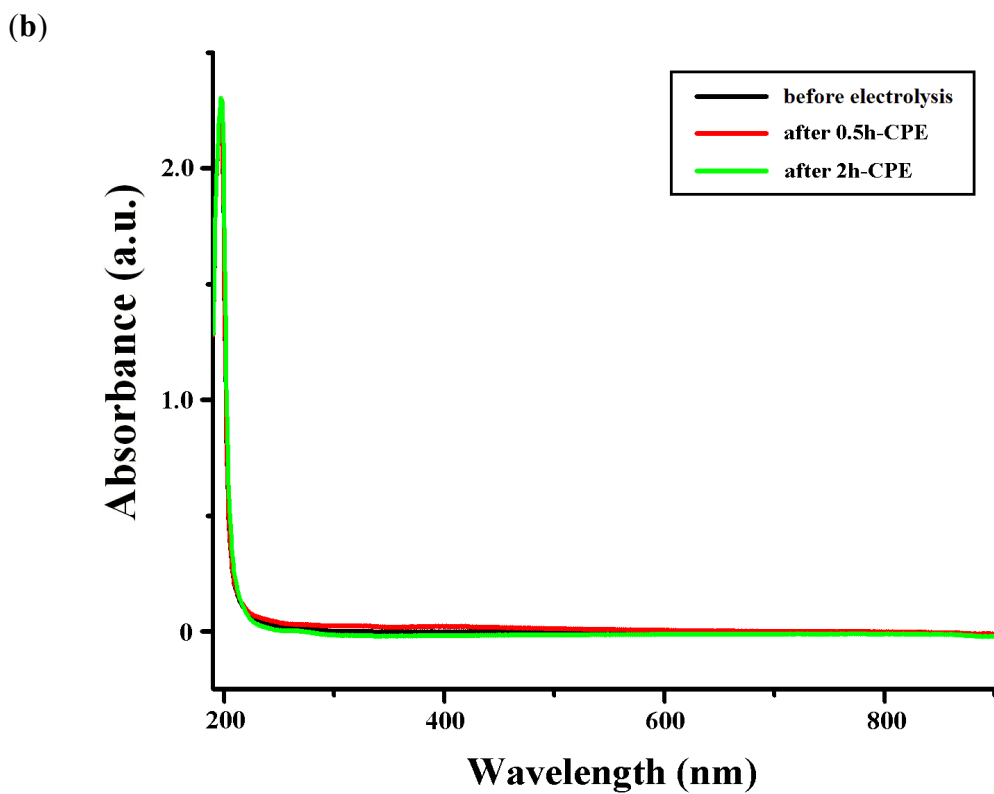

**Fig. S10** UV-vis absorption spectra at room temperature for the Na<sub>2</sub>SO<sub>4</sub> solution in the presence of 1-GCE (a) or 2-GCE (b) before and after electrolysis at -1.1 V vs SCE.

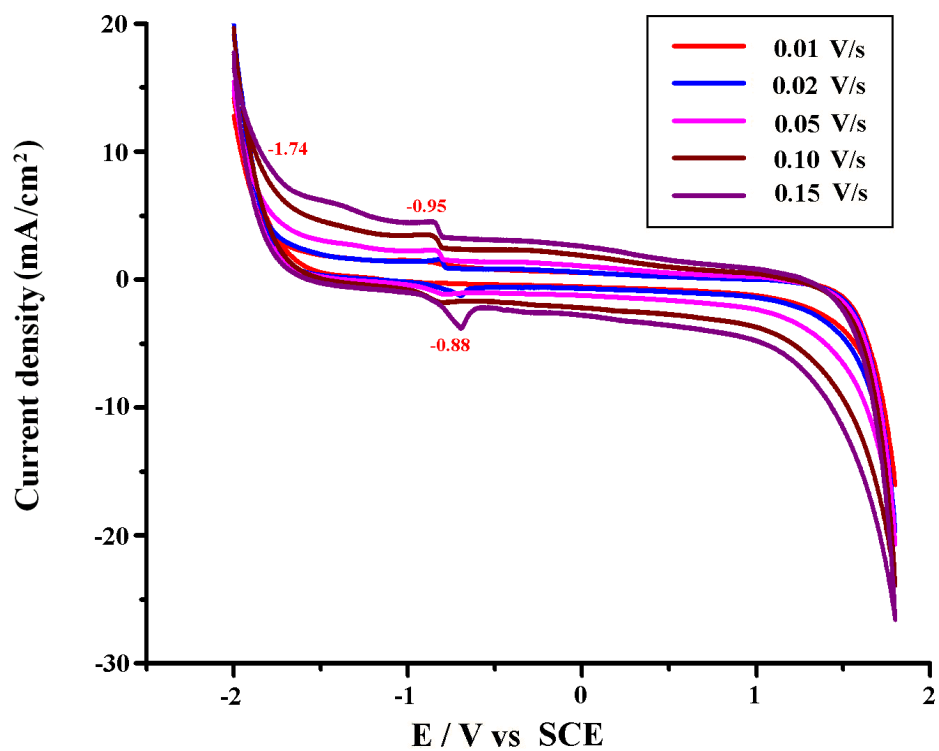

**Fig. S11** CVs of the 3-GCE in the 0.5M Na<sub>2</sub>SO<sub>4</sub> aqueous solution (50 mL) at different sweep rates.

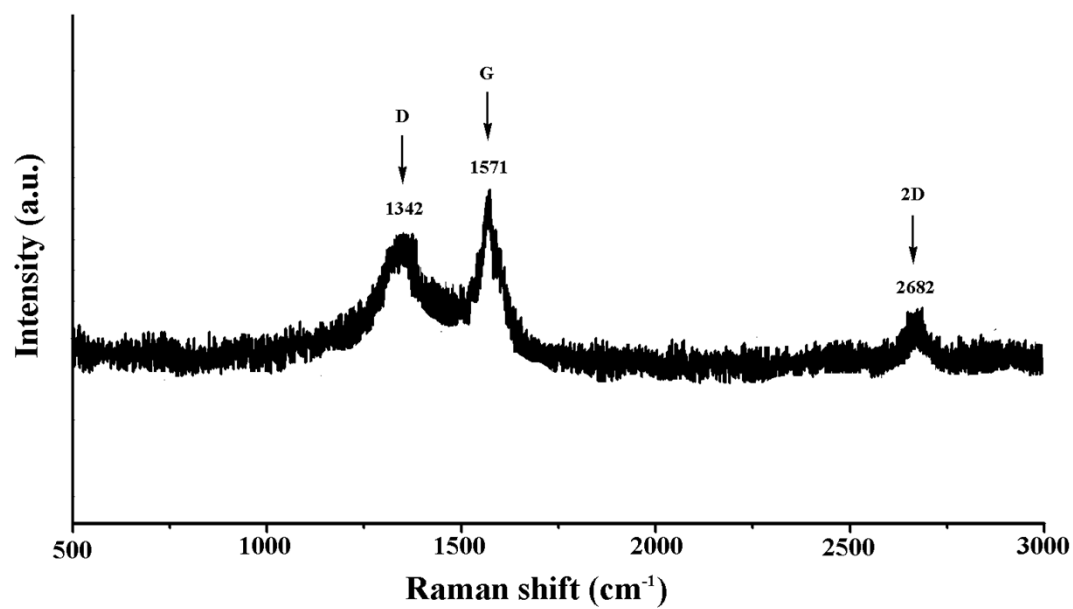

Fig. S12 Raman spectrum ( $\lambda_{\text{ex}} = 514.5 \text{ nm}$ , 0.4 mW) of the graphene.

(a)

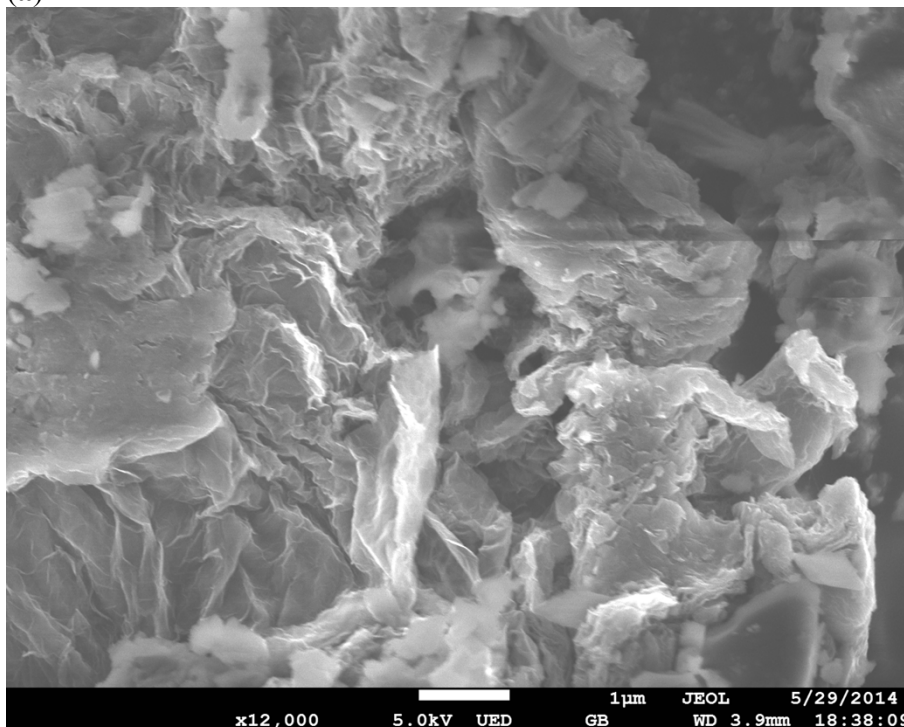



(b)

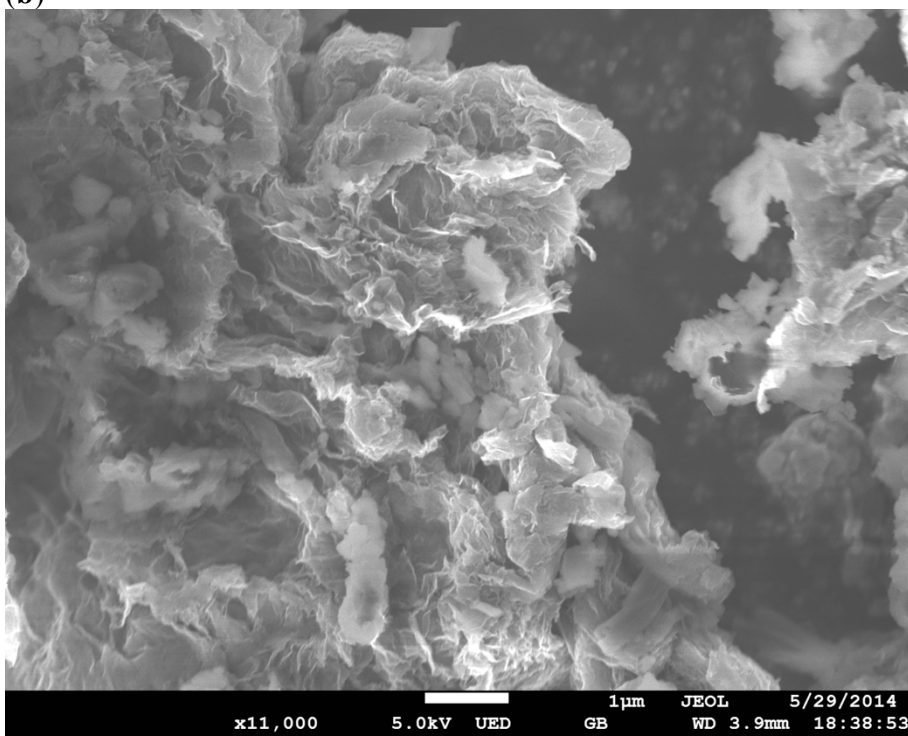

(c)

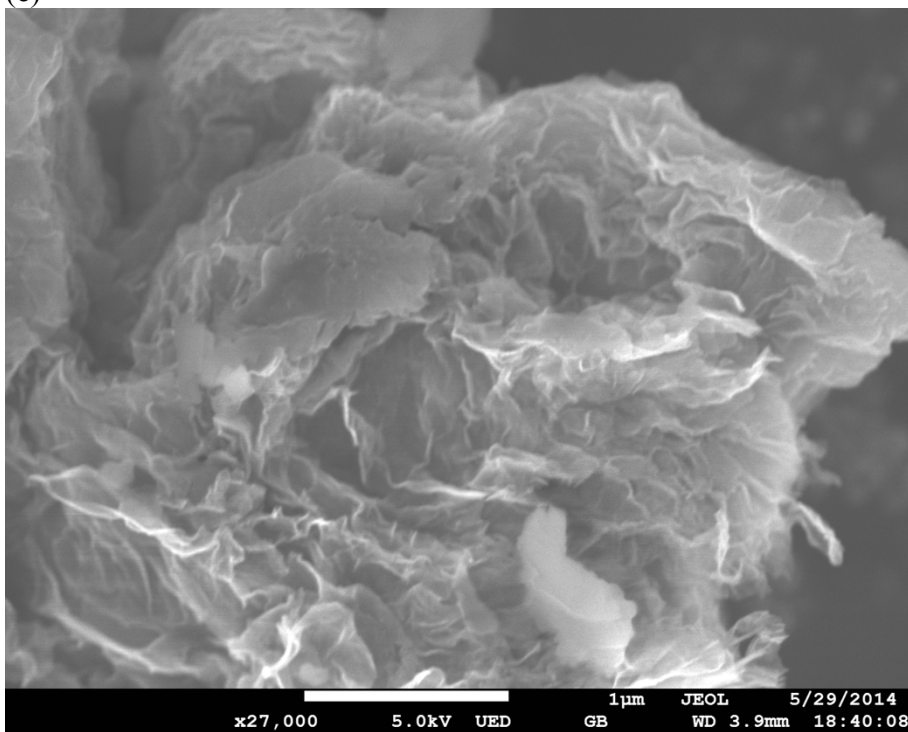

**Fig. S13** SEM images of the complex 1/graphene composite.

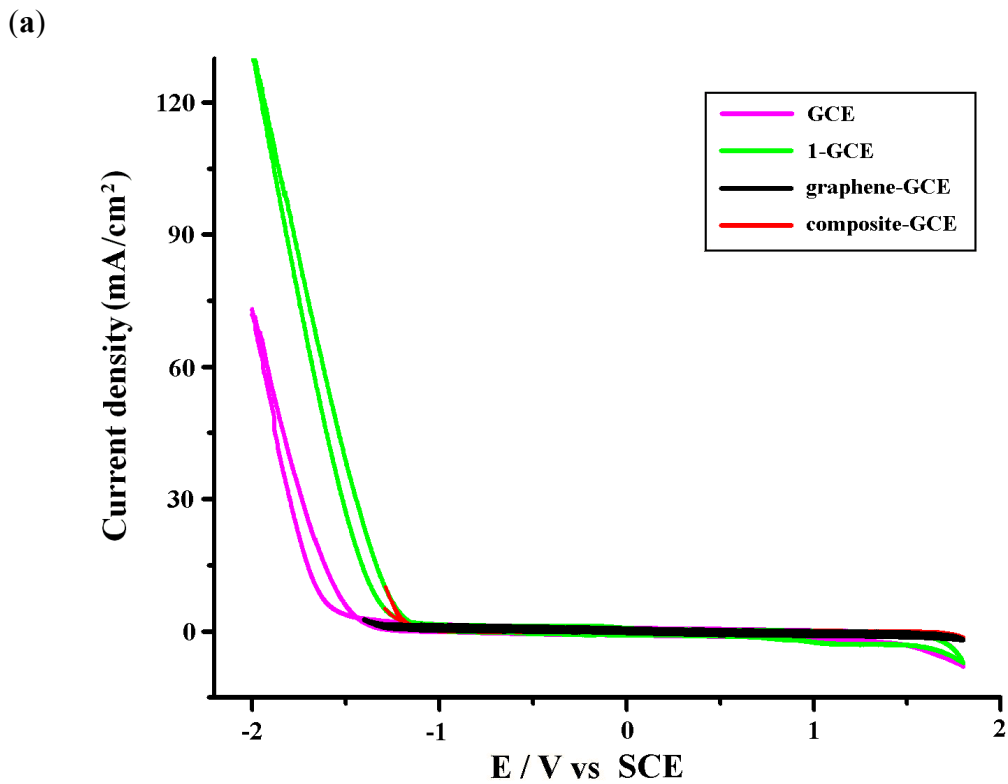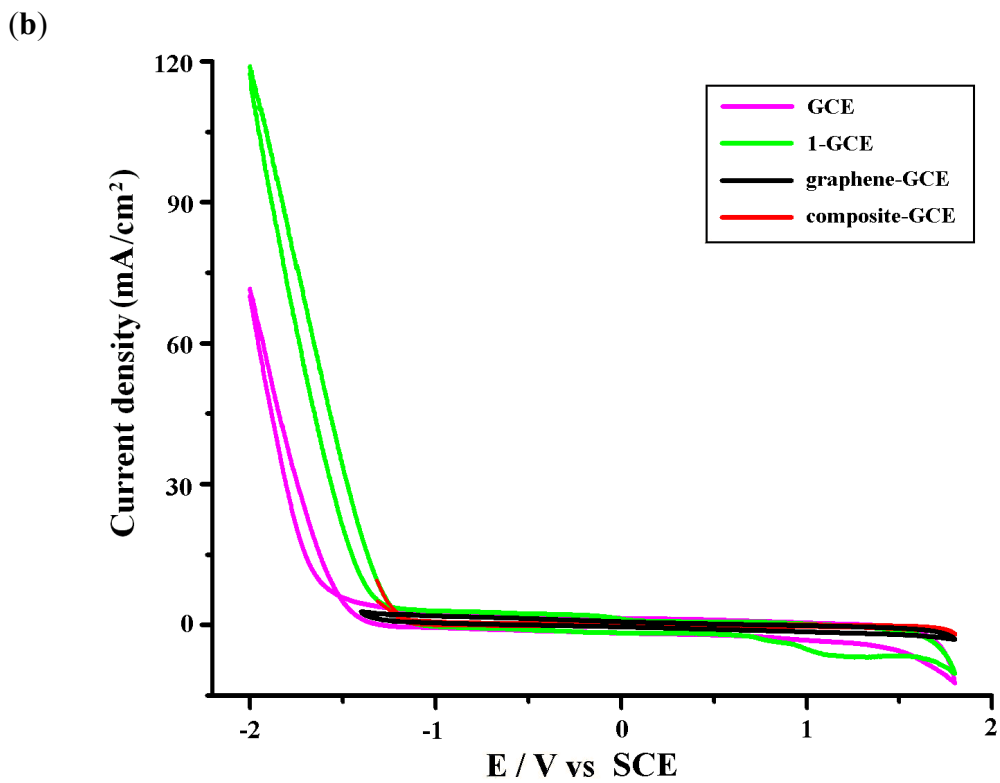

**Fig. S14** CVs of the bare GCE, 1-GCE, graphene-GCE and composite-GCE in 0.5 M  $\text{Na}_2\text{SO}_4$  solution (50mL) at a sweep rate of 20 (a) and 50  $\text{mV}\cdot\text{s}^{-1}$  (b).

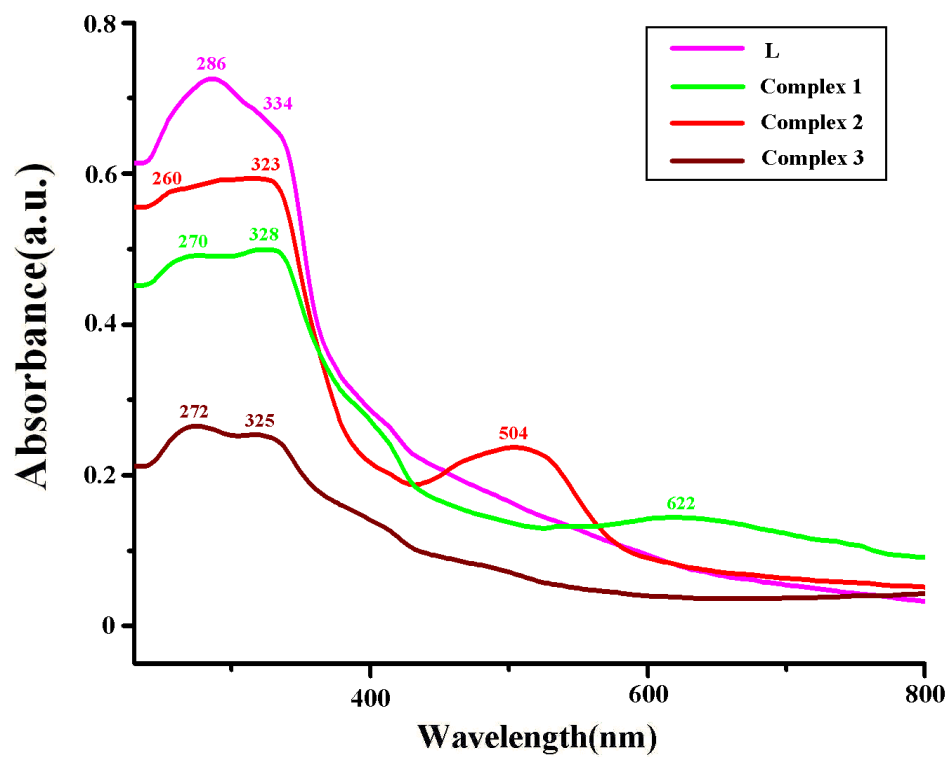

**Fig. S15** UV-vis absorption spectra at room temperature for the free organic ligand **L** and complexes 1-3.

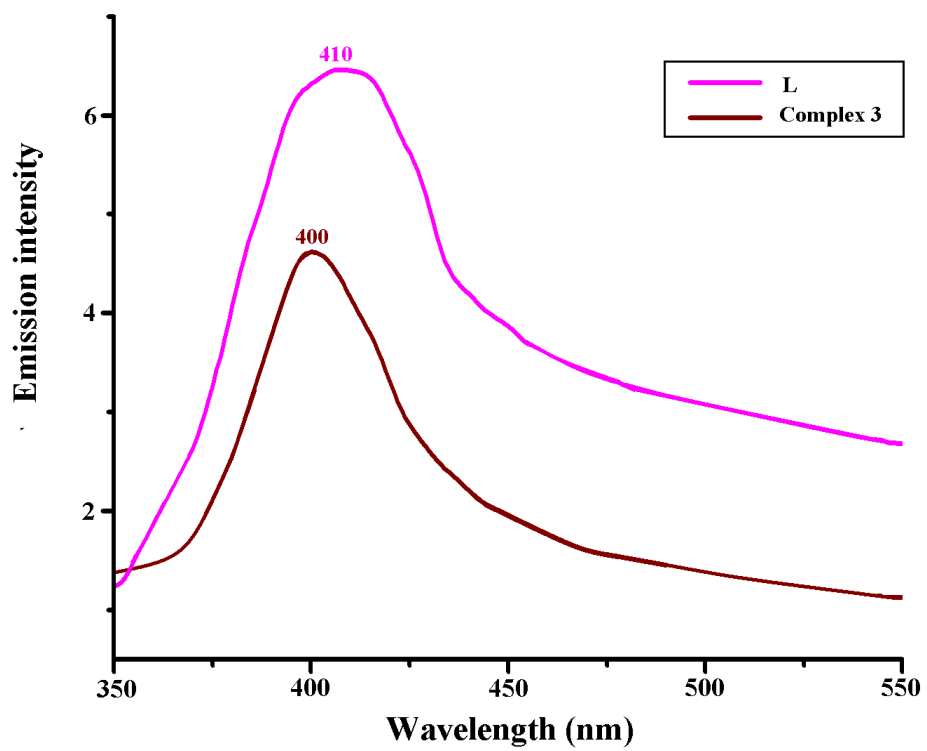

**Fig. S16** Solid-state emission spectra at room temperature for the free ligand **L** and complex **3**.

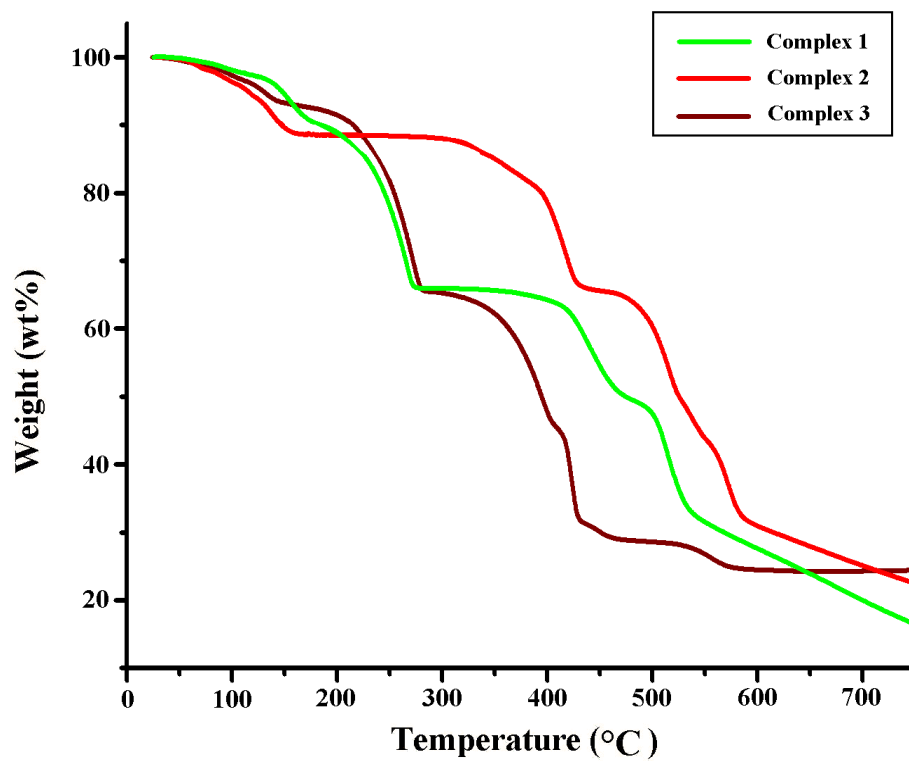

Fig.S17 Thermogravimetric curves of complexes 1 (green), 2 (red) and 3 (brown).

### References:

- 1 Y. J. Sun, J. P. Bigi, N. A. Piro, M. L. Tang, J. R. Long and C. J. Chang, *J. Am. Chem. Soc.*, **2011**, *133*, 9212.
